# Supplementary material for: Molecular characteristics and laminar distribution of prefrontal neurons projecting to the mesolimbic system
Source: eLife. 2022 Sep 5;11:e78813. doi: 10.7554/eLife.78813 (PMC9444245; doi:10.7554/eLife.78813)
Supplement: Figure 5—source data 1. [file elife-78813-fig5-data1.xlsx]

## Sheet: Munka1
Axon-density raw data
Animal ID		Stack ID	Nucleus	Axon-length (µm)	Slices in stack	Area (µm²)	Relative density*
F2073		F2073_Ctx1_06_NAc_63x	NAcSh	125082	182	18211.8	0.139768
		F2073_Ctx1_07_NAcC_63x	NAcC	191960	147	17068.5	0.283356
Animal data		F2073_Ctx1_07_NAcSh_63x	NAcSh	158679	148	17914.5	0.221661
Group	mPFC-NAc	F2073_Ctx1_08_NAcC_63x	NAcC	236485	138	16889.7	0.375784
Strain	WT	F2073_Ctx1_08_NAcSh_63x	NAcSh	195378	159	18158.5	0.250631
AAV inj. site	mPFC	F2073_Th1-2_02_VTA_63x	VTA	12918.9	152	18158.5	0.0173355
CAV2-Cre inj. Site	NAc	F2073_Th1-2_03_VTA_63x	VTA	10614.7	150	18176.3	0.0144195
Stack step size	0.27 µm	F2073_Th1-2_04_VTA_63x	VTA	7267.73	159	18176.3	0.0173186
Threshold**	0.85
Kernel**	6_11	Total	NAc	907583	774	88243	0.0492154
			VTA	30801.3	461	54511	0.00453963
Animal ID		Stack ID	Nucleus	Axon-length (µm)	Slices in stack	Area (µm²)	Relative density*
F2076		F2076_Ctx1_07_NAc_63x	NAcSh	71541.7	155	18176.3	0.0940502
		F2076_Ctx1_08_NAcC_63x	NAcC	79065.2	150	16694	0.116942
Animal data		F2076_Ctx1_08_NAcSh_63x	NAcSh	86817.2	168	18123	0.10561
Group	mPFC-NAc	F2076_Ctx1_09_NAcC_63x	NAcC	43598.5	156	17159.7	0.0603215
Strain	WT	F2076_Ctx1_09_NAcSh_63x	NAcSh	120971	174	18176.3	0.141665
AAV inj. site	mPFC	F2076_Th1-2_02_VTA_63x	VTA	5345.82	147	18158.5	0.00741742
CAV2-Cre inj. Site	NAc	F2076_Th1-2_03_VTA_63x	VTA	4351.47	134	18158.5	0.00662351
Stack step size	0.27 µm
Threshold**	0.85	Total	NAc	401993	803	88329.2	0.0209911
Kernel**	6_11		VTA	9697.29	281	36317	0.00351942
Animal ID		Stack ID	Nucleus	Axon-length (µm)	Slices in stack	Area (µm²)	Relative density*
F2077		F2077_Ctx1_04_NAc_63x	NAcSh	333247	167	18176.3	0.406613
		F2077_Ctx1_05_NAcC_63x	NAcC	250841	178	16435.4	0.317566
Animal data		F2077_Ctx1_05_NAcSh_63x	NAcSh	238572	172	18176.3	0.282633
Group	mPFC-NAc	F2077_Ctx1_06_NAcC_63x	NAcC	302612	152	16021.3	0.460236
Strain	WT	F2077_Ctx1_06_NAcSh_63x	NAcSh	260148	185	18176.3	0.286537
AAV inj. site	mPFC	F2077_Th1-2_01_VTA_63x	VTA	7258.25	127	18211.8	0.0116228
CAV2-Cre inj. Site	NAc	F2077_Th1-2_02_VTA_63x	VTA	6860.02	155	18158.5	0.00902714
Stack step size	0.27 µm	F2077_Th1-2_03_VTA_63x	VTA	10114.8	126	18042.1	0.0164792
Threshold**	0.85
Kernel**	6_11	Total	NAc	1.38542e+06	854	86985.6	0.0690737
			VTA	24233.1	408	54412.4	0.00404284
Animal ID		Stack ID	Nucleus	Axon-length (µm)	Slices in stack	Area (µm²)	Relative density*
F1809		F1809_Ctx1_07_NAc_63x	NAcSh	20065.7	154	18096.4	0.0266672
		F1809_Ctx1_09_NAc-core_63x	NAcC	35125.4	151	16769.9	0.0513749
Animal data		F1809_Ctx1_09_NAc-shell_63x	NAcSh	9664.53	162	18105.3	0.0122039
Group	mPFC-VTA	F1809_Ctx1_11_NAc-core_63x	NAcC	17534	125	18114.1	0.0286807
Strain	WT	F1809_Ctx1_11_NAc-shell_63x	NAcSh	48333.7	124	18140.8	0.0795809
AAV inj. site	mPFC	F1809_Th1-2_03_VTA_63x	VTA	74288.3	119	18123	0.127579
CAV2-Cre inj. Site	VTA	F1809_Th1-2_04_VTA_63x	VTA	71883.2	162	18087.5	0.0908593
Stack step size	0.27 µm	F1809_Th1-2_05_VTA_63x	VTA	50523.4	173	18105.3	0.0597417
Threshold**	0.9
Kernel**	6_11	Total	NAc	130723	716	89226.4	0.00757849
			VTA	196695	454	54315.8	0.0295425
Animal ID		Stack ID	Nucleus	Axon-length (µm)	Slices in stack	Area (µm²)	Relative density*
F1810		F1810_Ctx1_06_NAc-shell_63x	NAcSh	3065.45	78	18176.3	0.00800812
		F1810_Ctx1_07_NAc-core_63x	NAcC	15066.1	120	18105.2	0.0256833
Animal data		F1810_Ctx1_07_NAc-shell_63x	NAcSh	8897.91	128	18158.5	0.0141786
Group	mPFC-VTA	F1810_Ctx1_08_NAc-core_63x	NAcC	9340.77	129	18158.5	0.0147689
Strain	WT	F1810_Ctx1_08_NAc-shell_63x	NAcSh	10051.1	136	18140.7	0.0150889
AAV inj. site	mPFC	F1810_Th1-2_04_VTA_63x	VTA	22104.4	149	18140.7	0.0302882
CAV2-Cre inj. Site	VTA	F1810_Th1-2_05_VTA_63x	VTA	28466.6	155	17523.8	0.0388162
Stack step size	0.27 µm	F1810_Th1-2_06_VTA_63x	VTA	13342.6	138	18140.7	0.0197399
Threshold**	0.7
Kernel**	6_11	Total	NAc	46421.3	591	90739.2	0.00320606
			VTA	63913.6	442	53805.2	0.00995367
Animal ID		Stack ID	Nucleus	Axon-length (µm)	Slices in stack	Area (µm²)	Relative density*
F1812		F1812_Ctx2_06_NAc-shell_63x	NAcSh	43603.4	164	18176.3	0.0541762
		F1812_Ctx2_08_NAc-core_63x	NAcC	15659.6	123	17963.3	0.0262498
Animal data		F1812_Ctx2_08_NAc-shell_63x	NAcSh	15543	115	18176.3	0.0275403
Group	mPFC-VTA	F1812_Ctx2_09_NAc-core_63x	NAcC	21387.9	138	16090.8	0.0356738
Strain	WT	F1812_Ctx2_09_NAc-shell_63x	NAcSh	33745.7	143	18176.3	0.0480855
AAV inj. site	mPFC	F1812_Th1-2_03_VTA_63x	VTA	57682.3	120	18176.3	0.0979475
CAV2-Cre inj. Site	VTA	F1812_Th1-2_04_VTA_63x	VTA	72568.8	137	18140.7	0.108146
Stack step size	0.27 µm	F1812_Th1-2_05_VTA_63x	VTA	31521.6	156	18123	0.0412944
Threshold**	0.8
Kernel**	6_11	Total	NAc	129940	683	88582.9	0.0079544
			VTA	161773	413	54439.9	0.0266486
Animal ID		Stack ID	Nucleus	Axon-length (µm)	Slices in stack	Area (µm²)	Relative density*
F1529		F1529_Ctx2_06_NAc-shell_63x	NAcSh	113676	148	18176.3	0.156509
		F1529_Ctx2_07_NAc-core_63x	NAcC	195781	131	15674.2	0.353144
Animal data		F1529_Ctx2_07_NAc-shell_63x	NAcSh	362422	127	18105.2	0.583772
Group	mPFC-Rbp4	F1529_Ctx2_08_NAc-core_63x	NAcC	349531	139	18140.7	0.513395
Strain	Rbp4-Cre	F1529_Ctx2_08_NAc-shell_63x	NAcSh	302453	145	18176.3	0.425033
AAV inj. site	mPFC	F1529_Th2-2_04_VTA_63x	VTA	54203.8	168	15969.2	0.0748295
CAV2-Cre inj. Site	-	F1529_Th2-2_05_VTA_63x	VTA	45219.1	177	18123	0.0522103
Stack step size	0.27 µm
Threshold**	0.75	Total	NAc	1.32386e+06	690	88272.7	0.0805015
Kernel**	6_9		VTA	99423	345	34092.2	0.0313075
Animal ID		Stack ID	Nucleus	Axon-length (µm)	Slices in stack	Area (µm²)	Relative density*
F1531		F1531_Ctx2_07_NAc-shell_63x	NAcSh	171405	112	18176.2	0.311844
		F1531_Ctx2_08_NAc-core_63x	NAcC	122138	85	16788	0.317008
Animal data		F1531_Ctx2_08_NAc-shell_63x	NAcSh	115793	132	18140.7	0.179098
Group	mPFC-Rbp4	F1531_Ctx2_09_NAc-core_63x	NAcC	207921	138	17133.3	0.325697
Strain	Rbp4-Cre	F1531_Th2-2_03_VTA_63x	VTA	96459.9	122	18158.5	0.161267
AAV inj. site	mPFC	F1531_Th2-2_04_VTA_63x	VTA	105258	145	18176.3	0.147917
CAV2-Cre inj. Site	-	F1531_Th2-2_05_VTA_63x	VTA	151758	147	16330	0.234145
Stack step size	0.27 µm
Threshold**	0.8	Total	NAc	617257	467	70238.3	0.0696966
Kernel**	6_9		VTA	353476	414	52664.7	0.0600449
Animal ID		Stack ID	Nucleus	Axon-length (µm)	Slices in stack	Area (µm²)	Relative density*
F1530		F1530_Ctx2_06_Nac_63x	NAcSh	87782.1	160	18176.3	0.111794
		F1530_Ctx2_08_NAc-core_63x	NAcC	192717	160	15664.9	0.284779
Animal data		F1530_Ctx2_08_NAc-shell_63x	NAcSh	145005	160	18176.3	0.184669
Group	mPFC-Rbp4	F1530_Ctx2_09_NAc-core_63x	NAcC	97506.2	165	15657.1	0.139789
Strain	Rbp4-Cre	F1530_Ctx2_09_NAc-shell_63x	NAcSh	74259.9	169	18123	0.0897997
AAV inj. site	mPFC	F1530_Th2-2_03_VTA_63x	VTA	149777	129	18176.3	0.236586
CAV2-Cre inj. Site	-	F1530_Th2-2_04_VTA_63x	VTA	84056	166	17584.3	0.106653
Stack step size	0.27 µm	F1530_Th2-2_05_VTA_63x	VTA	66098.8	178	18176.3	0.0756668
Threshold**	0.8
Kernel**	6_9	Total	NAc	597270	814	85797.5	0.0316744
			VTA	299932	473	53936.8	0.0435424
Animal ID		Stack ID	Nucleus	Axon-length (µm)	Slices in stack	Area (µm²)	Relative density*
F1325		F1325_Ctx5_06_NAc-shell_63x	NAcSh	606104	166	18123	0.746183
		F1325_Ctx5_07_NAc-core_63x	NAcC	500626	124	17014.6	0.878834
Animal data		F1325_Ctx5_07_NAc-shell_63x	NAcSh	501105	127	18176.3	0.804001
Group	mPFC-Thy1	F1325_Ctx5_08_NAc-core_63x	NAcC	571358	120	17233.7	1.02326
Strain	Thy1-Cre	F1325_Ctx5_08_NAc-shell_63x	NAcSh	540538	144	18140.7	0.766382
AAV inj. site	mPFC	F1325_Th1-2_03_VTA_63x	VTA	209002	144	18176.3	0.295746
CAV2-Cre inj. Site	-	F1325_Th1-2_04_VTA_63x	VTA	103454	171	18176.3	0.123277
Stack step size	0.27 µm	F1325_Th1-2_05_VTA_63x	VTA	146916	177	14869.9	0.206739
Threshold**	0.75
Kernel**	6_9	Total	NAc	2.71973e+06	681	88688.3	0.166782
			VTA	459371	492	51222.4	0.0675111
Animal ID		Stack ID	Nucleus	Axon-length (µm)	Slices in stack	Area (µm²)	Relative density*
F1532		F1532_Ctx1_06_NAc-core_63x	NAcC	445907	175	17855.9	0.52852
		F1532_Ctx1_06_NAc-shell_63x	NAcSh	423489	175	18176.3	0.493101
Animal data		F1532_Ctx1_07_NAc-core_63x	NAcC	523427	104	16179.3	1.15213
Group	mPFC-Thy1	F1532_Ctx1_07_NAc-shell_63x	NAcSh	708703	120	18176.3	1.20341
Strain	Thy1-Cre	F1532_Ctx1_08_NAc-core_63x	NAcC	513615	96	15604.7	1.26984
AAV inj. site	mPFC	F1532_Ctx1_08_NAc-shell_63x	NAcSh	638215	78	18176.3	1.66726
CAV2-Cre inj. Site	-	F1532_Th1-2_03_VTA_63xB	VTA	165410	127	18176.3	0.265393
Stack step size	0.27 µm	F1532_Th1-2_04_VTA_63x	VTA	96801.4	144	16827.6	0.147956
Threshold**	0.75	F1532_Th1-2_06_VTA_63x	VTA	136741	139	16553.8	0.2201
Kernel**	6_9
		Total	NAc	2.80745e+06	573	86312.7	0.210242
			VTA	398952	410	51557.7	0.0699004
Animal ID		Stack ID	Nucleus	Axon-length (µm)	Slices in stack	Area (µm²)	Relative density*
F1534		F1534_Ctx4_06_Nac-shell_63x	NAcSh	117985	156	17427.6	0.160732
		F1534_Ctx4_07_NAc-core_63x	NAcC	229960	141	16368.8	0.369023
Animal data		F1534_Ctx4_07_NAc-shell_63x	NAcSh	552487	129	17947.9	0.883802
Group	mPFC-Thy1	F1534_Ctx4_08_NAc-core_63x	NAcC	369936	145	15916.8	0.593663
Strain	Thy1-Cre	F1534_Ctx4_08_NAc-shell_63x	NAcSh	438207	140	17358	0.667864
AAV inj. site	mPFC	F1534_Th1_12_VTA_63x	VTA	309943	127	18140.7	0.498264
CAV2-Cre inj. Site	-	F1534_Th1_13_VTA_63x	VTA	110817	129	18176.3	0.175044
Stack step size	0.27 µm	F1534_Th1_14_VTA_63x	VTA	96763.4	141	18105.3	0.140386
Threshold**	0.8
Kernel**	6_9	Total	NAc	1.70858e+06	711	85019	0.104685
			VTA	517523	397	54422.2	0.0887153
* Relative density = Axon-length/(Area*(Stack step size*Slices in stack))
** For details see https://github.com/baabek/Axon-density-analyzer-ImageJ-script.git
